# Supplementary material
Source: MDPI journal article supplement (https://www.mdpi.com/2072-4292/14/12/2932)
Supplement: s1 [file s1 › remotesensing-1762019-supplementary.pdf]

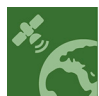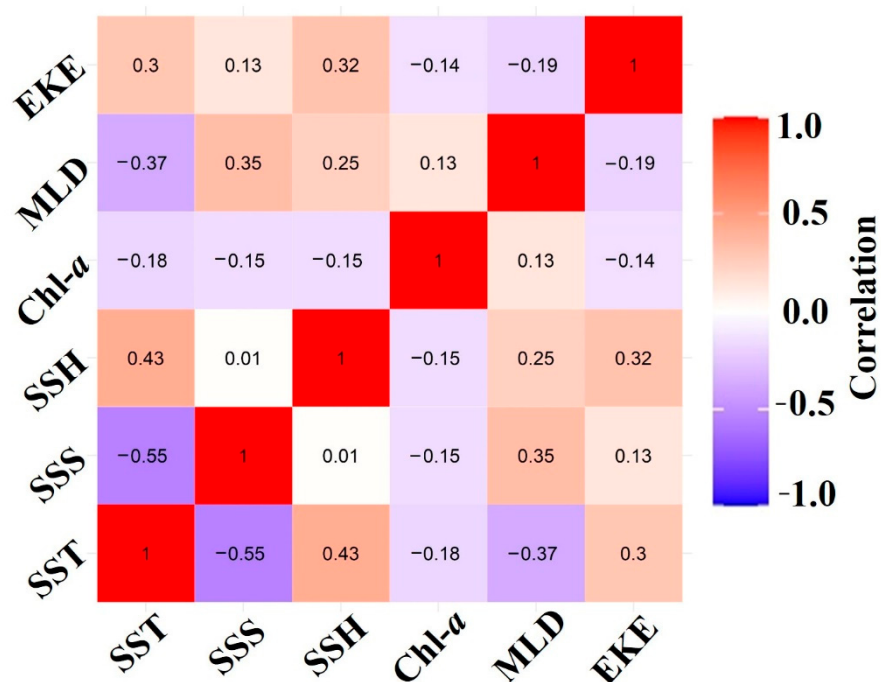

**Figure S1.** Multiple correlation coefficients for the relationship between greater amberjack oceanographic habitat preferences on the basis of satellite-observed environmental variables; all the environmental factors with correlation coefficients ranging from  $r = -0.55$  to  $0.43$ .
